# Supplementary material
Source: publisher site journal article supplement (https://www.spandidos-publications.com/2766/downloadSupplementary)

Figure S1. Flow chart of the present study. FUT4, fucosyltransferase 4; miR-200b, microRNA-200b-3p; LPS, lipopolysaccharide.

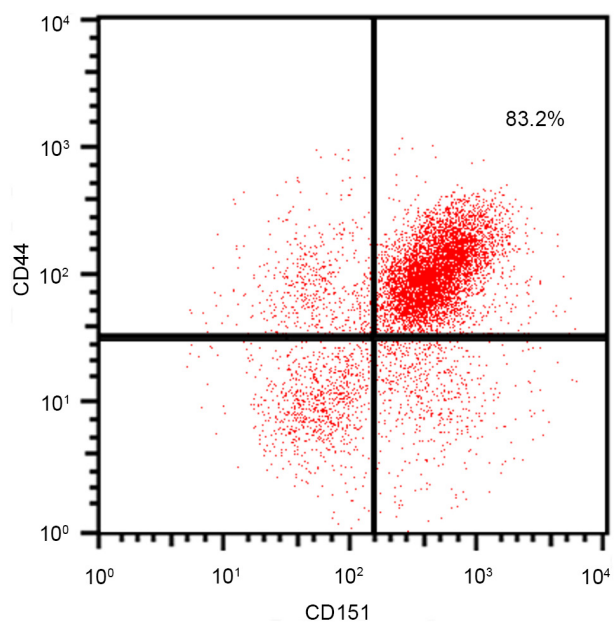

Figure S2. Expression of surface markers in chondrocytes. CD44 and CD151 antibodies were conjugated FITC or to phycoerythrin. The percentage of CD44<sup>+</sup>/CD151<sup>+</sup> cells was calculated. \*P<0.05.

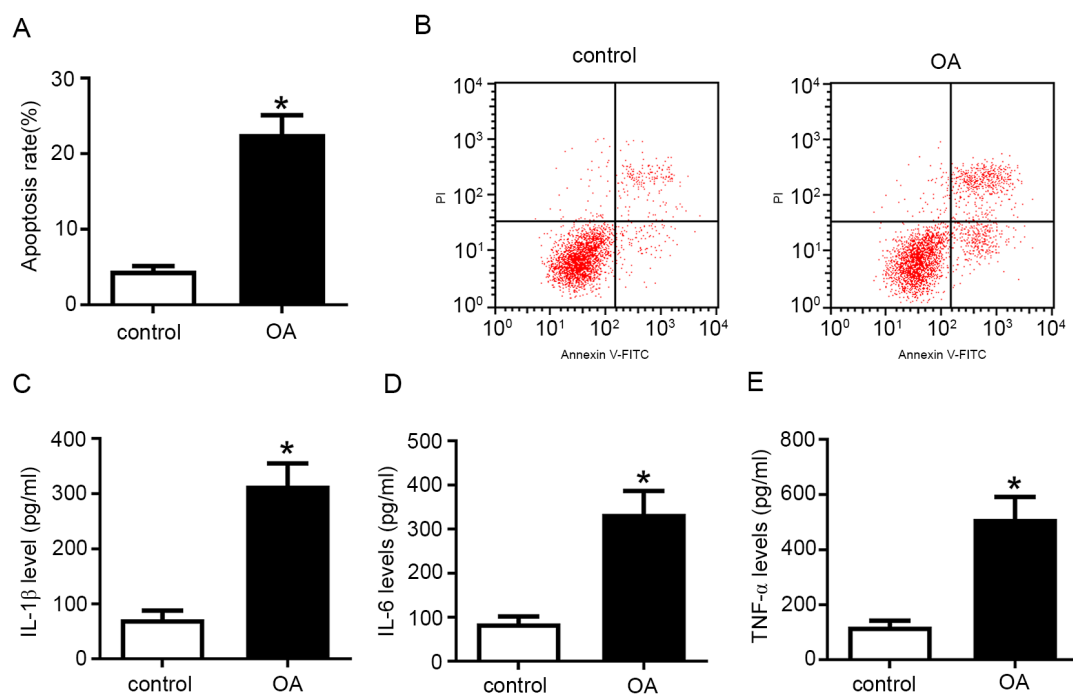

Figure S3. Inflammatory injury in knee articular chondrocytes isolated from patients with OA. Knee articular chondrocytes were isolated from tissue samples of patients with OA and normal controls. (A and B) The apoptosis rate was determined using flow cytometry. The production of (C) IL-1 $\beta$ , (D) IL-6 and (E) TNF- $\alpha$  was evaluated by ELISA. \*P<0.05 vs. control. OA, osteoarthritis.

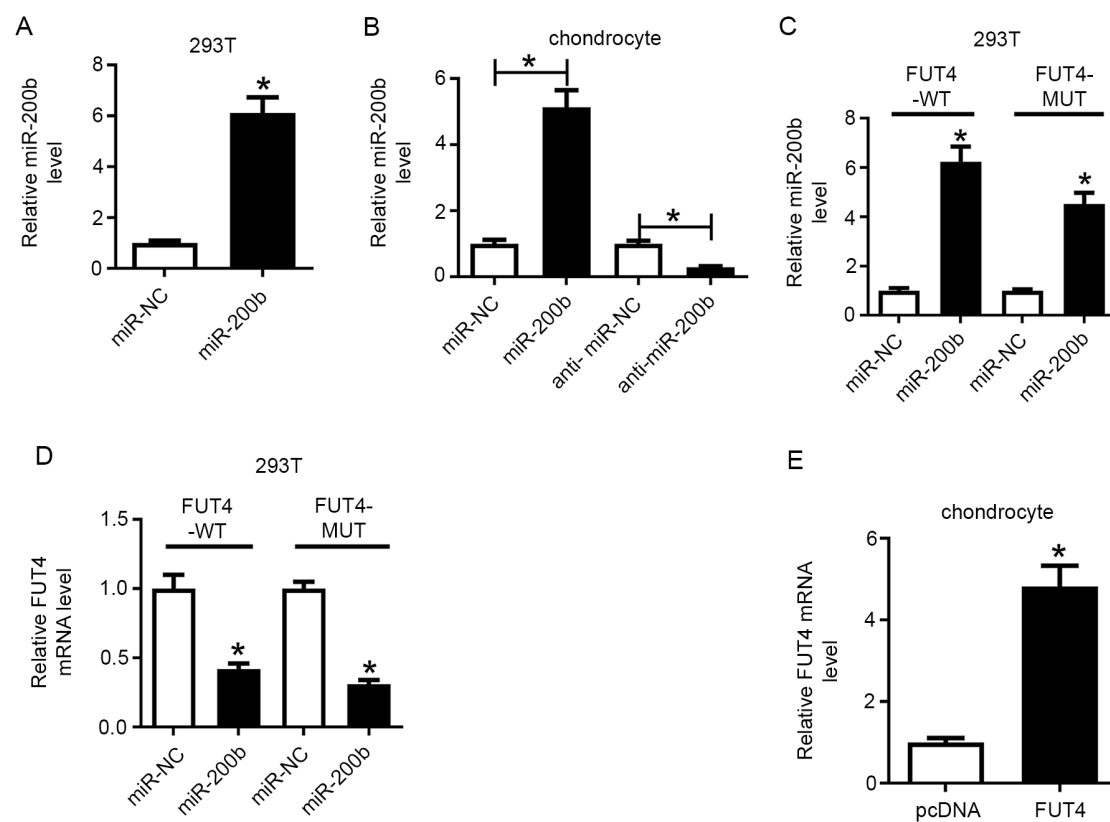

Figure S4. Expression of miR-200b and FUT4 in transfected cells. RT-qPCR was used to detect miR-200b expression level in (A) 293T cells transfected with miR-200b or miR-NC, (B) Chondrocytes transfected with miR-NC, miR-200b, anti-miR-NC or anti-miR-200b and (C) 293T cells co-transfected with miR-200b/NC and FUT4-WT/MUT. RT-qPCR was used to detect FUT4 mRNA expression level in (D) 293T cells co-transfected with miR-200b/NC and FUT4-WT/MUT and (E) Chondrocytes transfected with pcDNA-FUT4 or pcDNA. \*P<0.05 vs. the respective control group. FUT4, fucosyltransferase 4; NC, negative control; RT-qPCR, reverse transcription-quantitative PCR; miR-200b, microRNA-200b-3p; WT, wild-type; MUT, mutant.

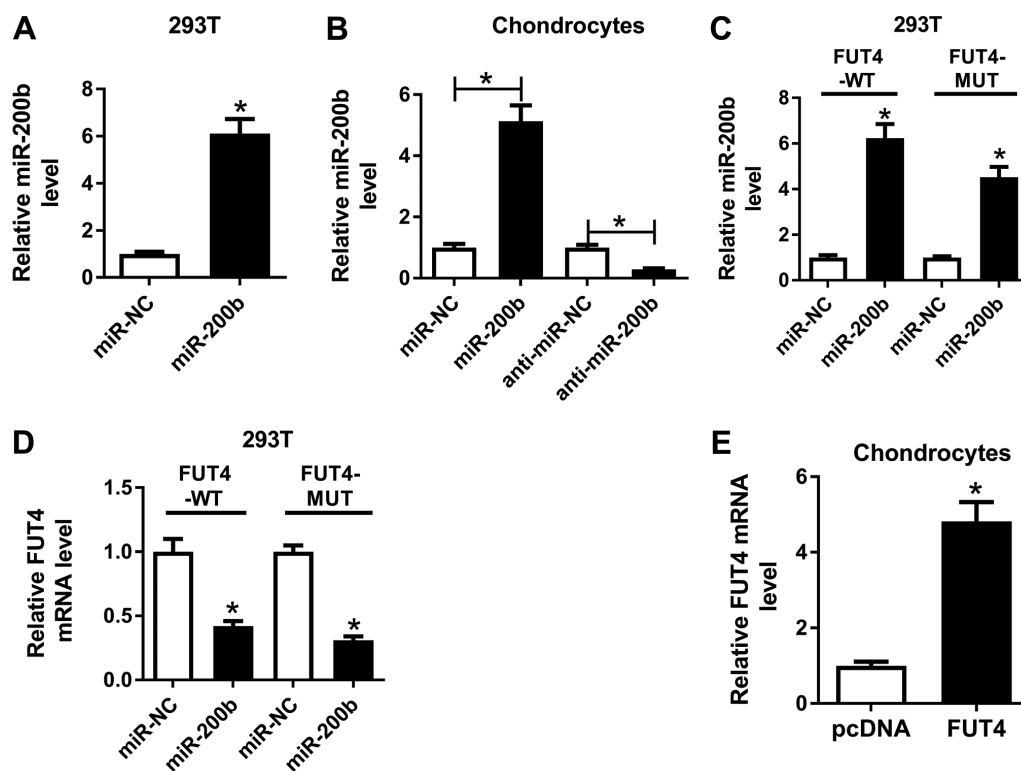

Supplement: Supplementary file 1 [file downloadSupplementary]
